# Supplementary material for: Ability of Garlic and Ginger Oil to Reduce Salmonella in Post-Harvest Poultry
Source: MDPI journal article supplement (doi:10.3390/ani12212974), 2022-10-29
Supplement: s1 [file s1]

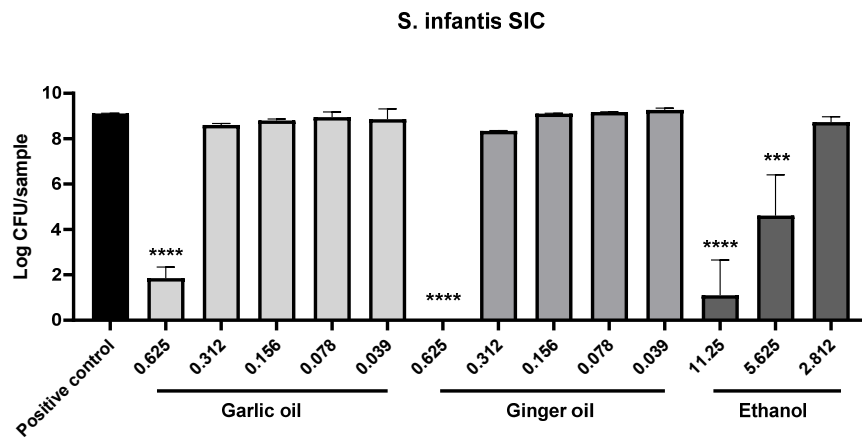

**Figure S1: Determination of SIC of garlic oil, ginger oil and ethanol against *S. Infantis* in a microtiter plate. Results are averages of two independent experiments, each contains duplicates samples (mean and STD). \*\*\* $P < 0.001$ ; \*\*\*\* $P < 0.0001$ .**
